# Supplementary material for: Highly efficient carrier multiplication in PbS nanosheets
Source: PubMed Central journal article supplement — Nat Commun. 2014 Apr 30;5:3789. doi: 10.1038/ncomms4789 (PMC4015322; doi:10.1038/ncomms4789), 2014-04-30
Supplement: ncomms4789-s1.pdf [file ncomms4789-s1.pdf]

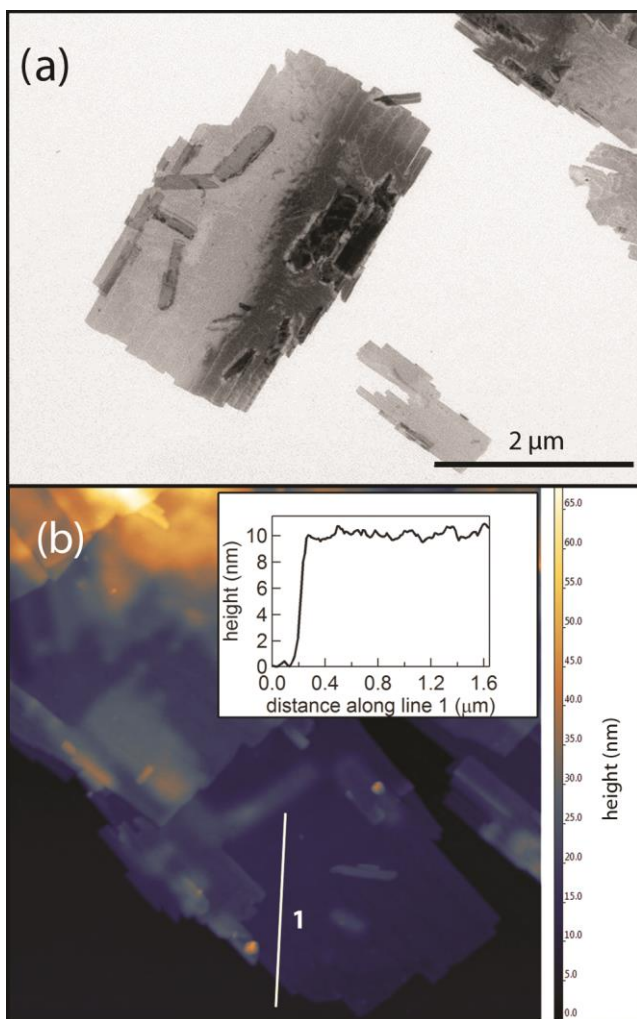

**Supplementary Figure 1:** a) TEM image of a representative PbS nanosheet, with smaller nanosheets stacked upon it. b) AFM image of PbS nanosheets. The inset shows a height profile scan along line 1, corresponding with a total thickness of 9.5 nm. The double oleic acid ligand layer has a total thickness of 3.5 nm, and consequently the thickness of the nanosheet is 6.0 nm.

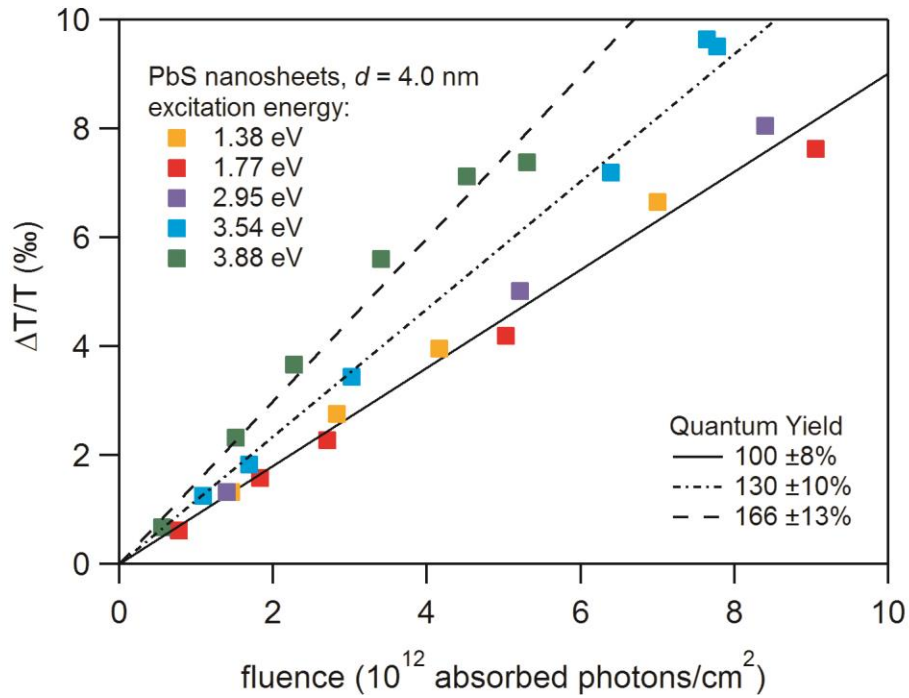

**Supplementary Figure 2:**  $\Delta T_{\max}/T$  versus the number of absorbed photons per unit area at various photon energies for the PbS sheets with  $d = 4.0$  nm. The solid and dashed lines are linear fits to the data. The slope of the lines is equal to  $(\Delta T_{\max}/T)/(I_0 F_A) = \Phi \sigma$ , with  $\Phi$  the quantum yield given in the legend at the lower right in the graph.

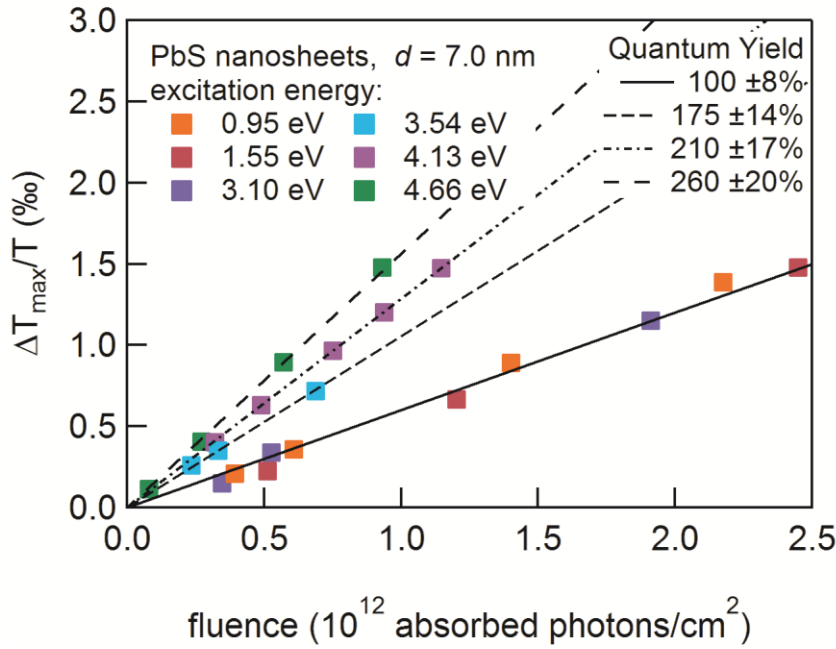

**Supplementary Figure 3:**  $\Delta T_{\max}/T$  versus the number of absorbed photons per unit area at various photon energies for the PbS sheets with  $d = 7.0$  nm. The solid and dashed lines are linear fits to the data. The slope of the lines is equal to  $(\Delta T_{\max}/T)/(I_0 F_A) = \Phi \sigma$ , with  $\Phi$  the quantum yield given in the legend at the upper right in the graph.
